# Supplementary material
Source: publisher site journal article supplement (https://www.dovepress.com/article/452980)
Supplement: Supplementary file 1 [file get_supplementary_file.php]

Supplementary Material

Table S1: Basic clinical information for both datasets.

| GEO accession | Web page link | Overall design |
| --- | --- | --- |
| GSE65682 | https://www.ncbi.nlm.nih.gov/geo/query/acc.cgi?acc=GSE65682 | PAXgene blood RNA was isolated at intensive-care unit (ICU) admission and throughout ICU length-of-stay. Through the use of genome-wide microarrays we aimed to identify molecular features that enbale the adequate discrimination of infectious and non-infectious sources of critical illness. Patient diagnoses include community-acquired pneumonia (cap), hospital-acquired pneumonia (hap) and non-infectious cap control patients (no-cap) (characteristics: pneumonia diagnoses). The influence of variable degrees of thrombocytopenia were also assessed (characteristics: thrombocytopenia). |
| GSE57065 | https://www.ncbi.nlm.nih.gov/geo/query/acc.cgi?acc=GSE57065 | Twenty-eight ICU patients were enrolled at the onset of septic shock. Blood samples were collected within 30 minutes, 24 and 48 hours after septic shock and compared to twenty-five healthy volunteers |
|  |  |  |

Table S2: Index table of animal model.

| Index | Scores - Description |
| --- | --- |
| Appearance | 0- Shiny, smooth  1- Part of the hair has vertical hairs  2- All hair on the back is upright  3- Fluffy, messy  4- Coke |
| Autonomous consciousness | 0- Active  1- Active, not upright  2- Reduced activity, delayed, still walking  3 - After the provocation, the action is shocking  4- Still motionless after provocation |
| Autonomous activity | 0- Normal amount of activity (eating, drinking, climbing, walking, fighting, etc.)  1- Reduced activity, only at the bottom of the cage  2- Significant decrease in activity, inactivity, occasional exploration of activity  3- Stay still  4- Immobility, trembling (especially in the hind limbs) |
| Response to stimuli | 0- Quick response  1- No or slow response to sound, strong response to touch (flee immediately)  2- No response to sound, average response to touch (walk a few steps)  3- No response to sound, weak response to touch (does not move)  4- No response to sound, almost no response to touch, unable to roll over after being pushed |
| Eyes | 0- Open all  1- It's not all open. It could be secreted  2- semi-closed, possibly secretory  3- It's not completely closed. It might be secreted  4- Closed or significant discharge (cloudy) |

Table S3: Primer sequence.

| Genes | Primer sequence |
| --- | --- |
| qM-Nfe2l2-F | GCTGCTCGGACTAGCCATTGC |
| qM-Nfe2l2-R | GCGTGCTCAGAAACCTCCTTCC |
| qM-Dlst-F | CTTCACCATCAGCAACGGAGGAG |
| qM-Dlst-R | GCCAATAGTATGTGCCTGCCTGTC |
| qM-Mtf1-F | GGCTGAAGTGTTGCTAGGTGAAGG |
| qM-Mtf1-R | GTGGTGATGGCTGTCGTGGAAG |
| qM-Nlrp3-F | GGACAGCCTTGAAGAAGAGTGGATG |
| qM-Nlrp3-R | TGCTTGCTTGGATGCTCCTTGAC |
| qM-Slc31a1-F | TGCCAATAGCCAGTTGTTCTCAGTG |
| qM-Slc31a1-R | AACAGACCAGCATAGGAAGAATCGC |
| qM-Pdhb-F | GTTGTCATTCGGCAGCTAGTAGAGG |
| qM-Pdhb-R | CCGTCATACTGGGCAACTTCTTCC |
| qM-Dld-F | TGCCATCAAATCTGCCCAGTTAGG |
| qM-Dld-R | ATCAATAACCTGAGTGCTGCCATCG |
| qM-Dlat-F | AGGAGACTTGCTGGCAGAGATAGAG |
| qM-Dlat-R | GACTAACGAACACCCTTCCCTTTGG |
| qM-Cdkn2a-F | TTCAGGTGATGATGATGGGCAACG |
| qM-Cdkn2a-R | CCACCCAGCGGAACACAAAGAG |
